# Supplementary material for: Molecular modelling of shockwave-mediated delivery of paclitaxel aggregates across the neuronal plasma membrane
Source: Royal Society of Chemistry journal article supplement (doi:10.1039/d3cp01722b), 2023-01-01
Supplement: d3cp01722b1.pdf [file d3cp01722b1.pdf]

*Supporting Information for*

**Molecular Modeling of Shockwave-mediated Delivery  
of Paclitaxel Aggregates across the Neuronal Plasma  
Membrane**

*Mi Zhou,<sup>a,b</sup> Wenyu Zhou,<sup>a</sup> Hong Yang,<sup>a</sup> Luoxia Cao,<sup>a</sup> Ming Li,<sup>a</sup> and Yang Zhou<sup>a,\*</sup>*

<sup>a</sup> Institute of Chemical Materials, Chinese Academy of Engineering and Physics,  
621900 Mianyang, China;

<sup>b</sup> School of Materials Science & Engineering, Beijing Institute of Technology, 100081  
Beijing, China.

AUTHOR INFORMATION

**Corresponding Author**

\*Yang Zhou. E-mail: zhouy@caep.cn

## Captions

**Table S1.** The composition of plasma membrane.

**Figure S1.** All systems used in this simulation.

**Figure S2.** Pressure versus time curve at membrane surface when  $D = 10$  (a), 20 (b), 30 (c), 40 (d) and 50 nm, respectively,  $u_p = 0.9$  km/s.

**Figure S3.** The radius of gyration (Rg) of PTX cluster during shock process when  $D = 10, 20, 30, 40,$  and 50 nm, respectively.

**Figure S4.** Pore area vs shock simulation time under bubble arrangement with slanted (Model 6 and 7), parallel (Model 8), serial (Model 9) and single bubble (Model 2), all bubble diameter is 20 nm. The shock wave can rebound in 100 ps simulation time, so we only analyze the non-rebound stage, the solid line.

**Figure S5.** Delayed snapshot of the dynamic process of recovery simulation when the penetration depth of PTX is (a) 11.6 nm (after 78 ps shock wave when  $D = 20$  nm,  $u_p = 1.1$  km/s); (b) 18.7 nm (after 100 ps shock wave when  $D = 40$  nm,  $u_p = 0.7$  km/s); (c) 20 nm (after 40 ps shock wave when  $D = 40$  nm,  $u_p = 1.1$  km/s); (d) 37.7 nm (after 70 ps shock wave when  $D = 40$  nm,  $u_p = 1.1$  km/s) and (e) 21.2 nm (after 86 ps shock wave when  $D = 30$  nm,  $u_p = 0.9$  km/s), respectively.

**Table S1.** The composition of plasma membrane.

| Composition name                       | Number of lipids |               | Total        |
|----------------------------------------|------------------|---------------|--------------|
|                                        | Outer leaflet    | Inner leaflet |              |
| Phosphatidylcholine (PC)               | 2412             | 1288          | 3700         |
| Phosphatidylethanolamine (PE)          | 1093             | 2017          | 3110         |
| Sphingomyelin (SM)                     | 892              | 219           | 1111         |
| Phosphatidylserine (PS)                | 0                | 930           | 930          |
| Glycolipid (GM1)                       | 135              | 0             | 135          |
| Glycolipid (GM3)                       | 135              | 0             | 135          |
| Cerebrosides (CERE)                    | 742              | 0             | 742          |
| Phosphatidylinositol (PI)              | 0                | 484           | 484          |
| Phosphatidic acid (PA)                 | 0                | 38            | 38           |
| Phosphatidylinositol phosphates (PIPs) | 0                | 132           | 132          |
| Ceramide (CER)                         | 56               | 55            | 111          |
| Lysophosphatidylcholine (LPC)          | 30               | 15            | 45           |
| Lysophosphatidylethanolamine (LPE)     | 15               | 30            | 45           |
| Diacylglycerol (DAG)                   | 38               | 38            | 76           |
| Cholesterol (CHOL)                     | 4431             | 4222          | 8653         |
| <b>Total lipids</b>                    | <b>9979</b>      | <b>9468</b>   | <b>19435</b> |

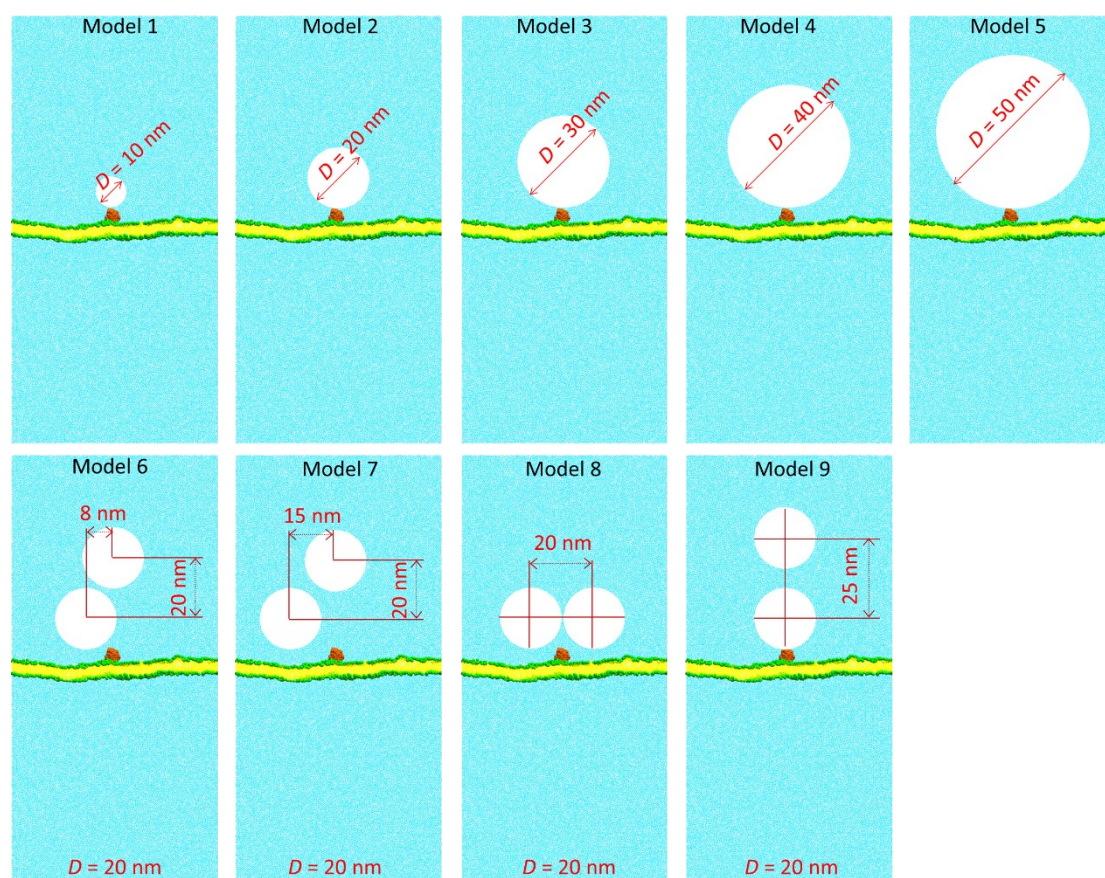

**Figure S1.** All systems used in this simulation.

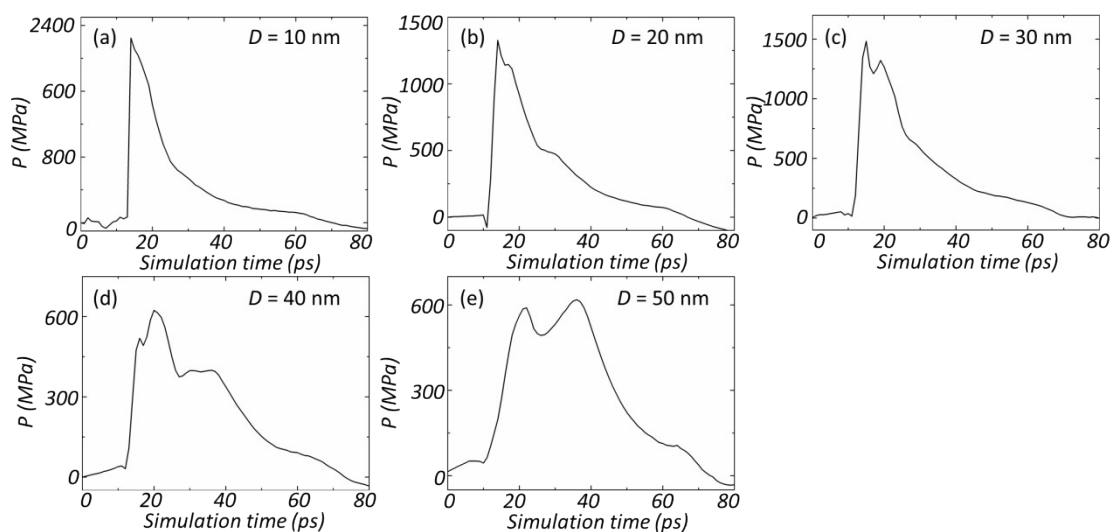

**Figure S2.** Pressure versus time curve at membrane surface when  $D = 10$  (a),  $20$  (b),  $30$  (c),  $40$  (d) and  $50$  nm, respectively,  $u_p = 0.9$  km/s.

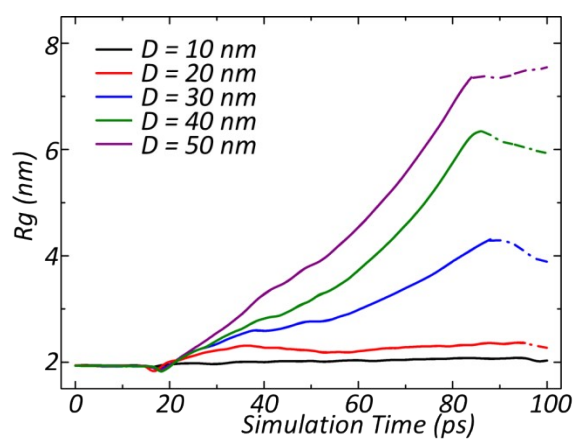

**Figure S3.** The radius of gyration ( $R_g$ ) of PTX cluster during shock process when  $D = 10, 20, 30, 40,$  and  $50$  nm, respectively.

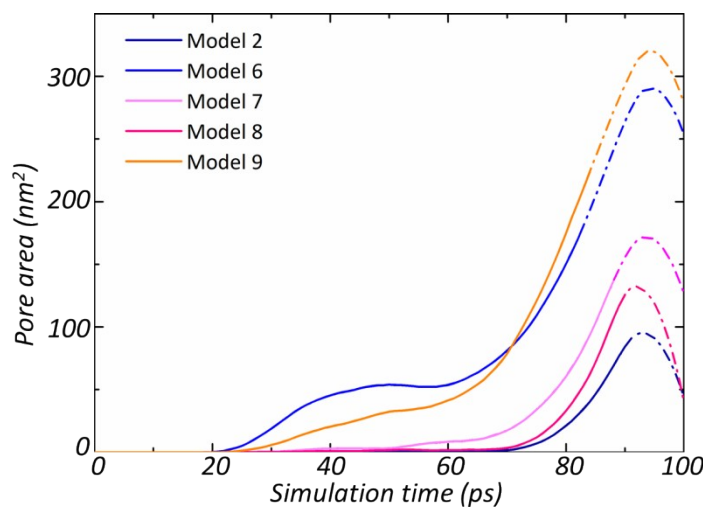

**Figure S4.** Pore area vs shock simulation time under bubble arrangement with slanted (Model 6

and 7), parallel (Model 8), serial (Model 9) and single bubble (Model 2), all bubble diameter is 20 nm,  $u_p = 0.9$  km/s. The shock wave can rebound in 100 ps simulation time, so we only analyze the non-rebound stage, the solid line.

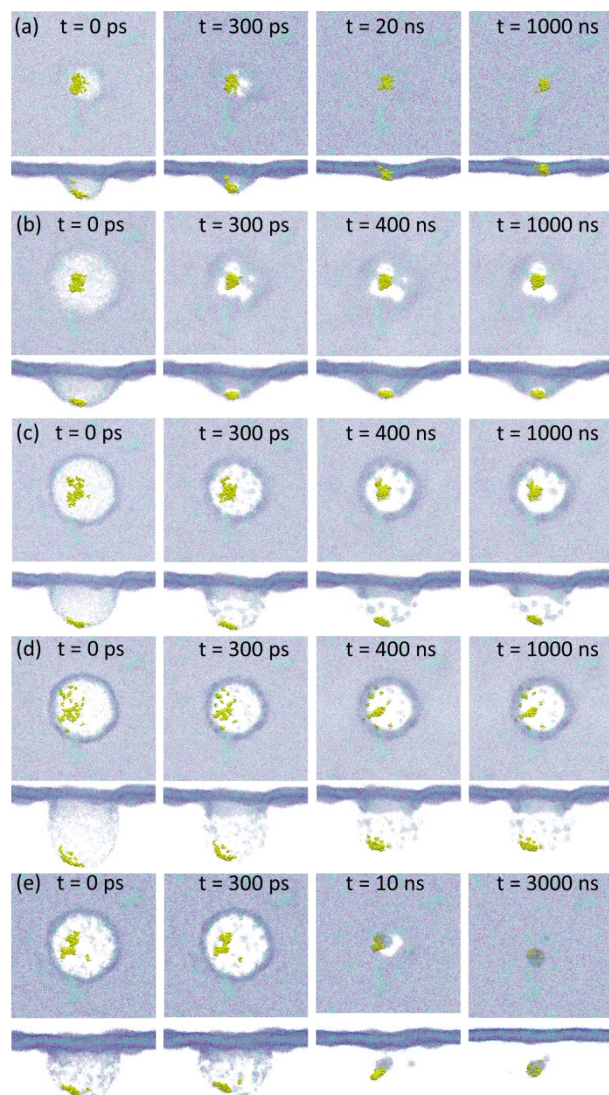

**Figure S5.** Delayed snapshot of the dynamic process of recovery simulation when the penetration depth of PTX is (a) 11.6 nm (after 78 ps shock wave when  $D = 20$  nm,  $u_p = 1.1$  km/s); (b) 18.7 nm (after 100 ps shock wave when  $D = 40$  nm,  $u_p = 0.7$  km/s); (c) 20 nm (after 40 ps shock wave when  $D = 40$  nm,  $u_p = 1.1$  km/s); (d) 37.7 nm (after 70 ps shock wave when  $D = 40$  nm,  $u_p = 1.1$  km/s) and (e) 21.2 nm (after 86 ps shock wave when  $D = 30$  nm,  $u_p = 0.9$  km/s), respectively.
